# Supplementary material
Source: PubMed Central journal article supplement (PMC4831451)

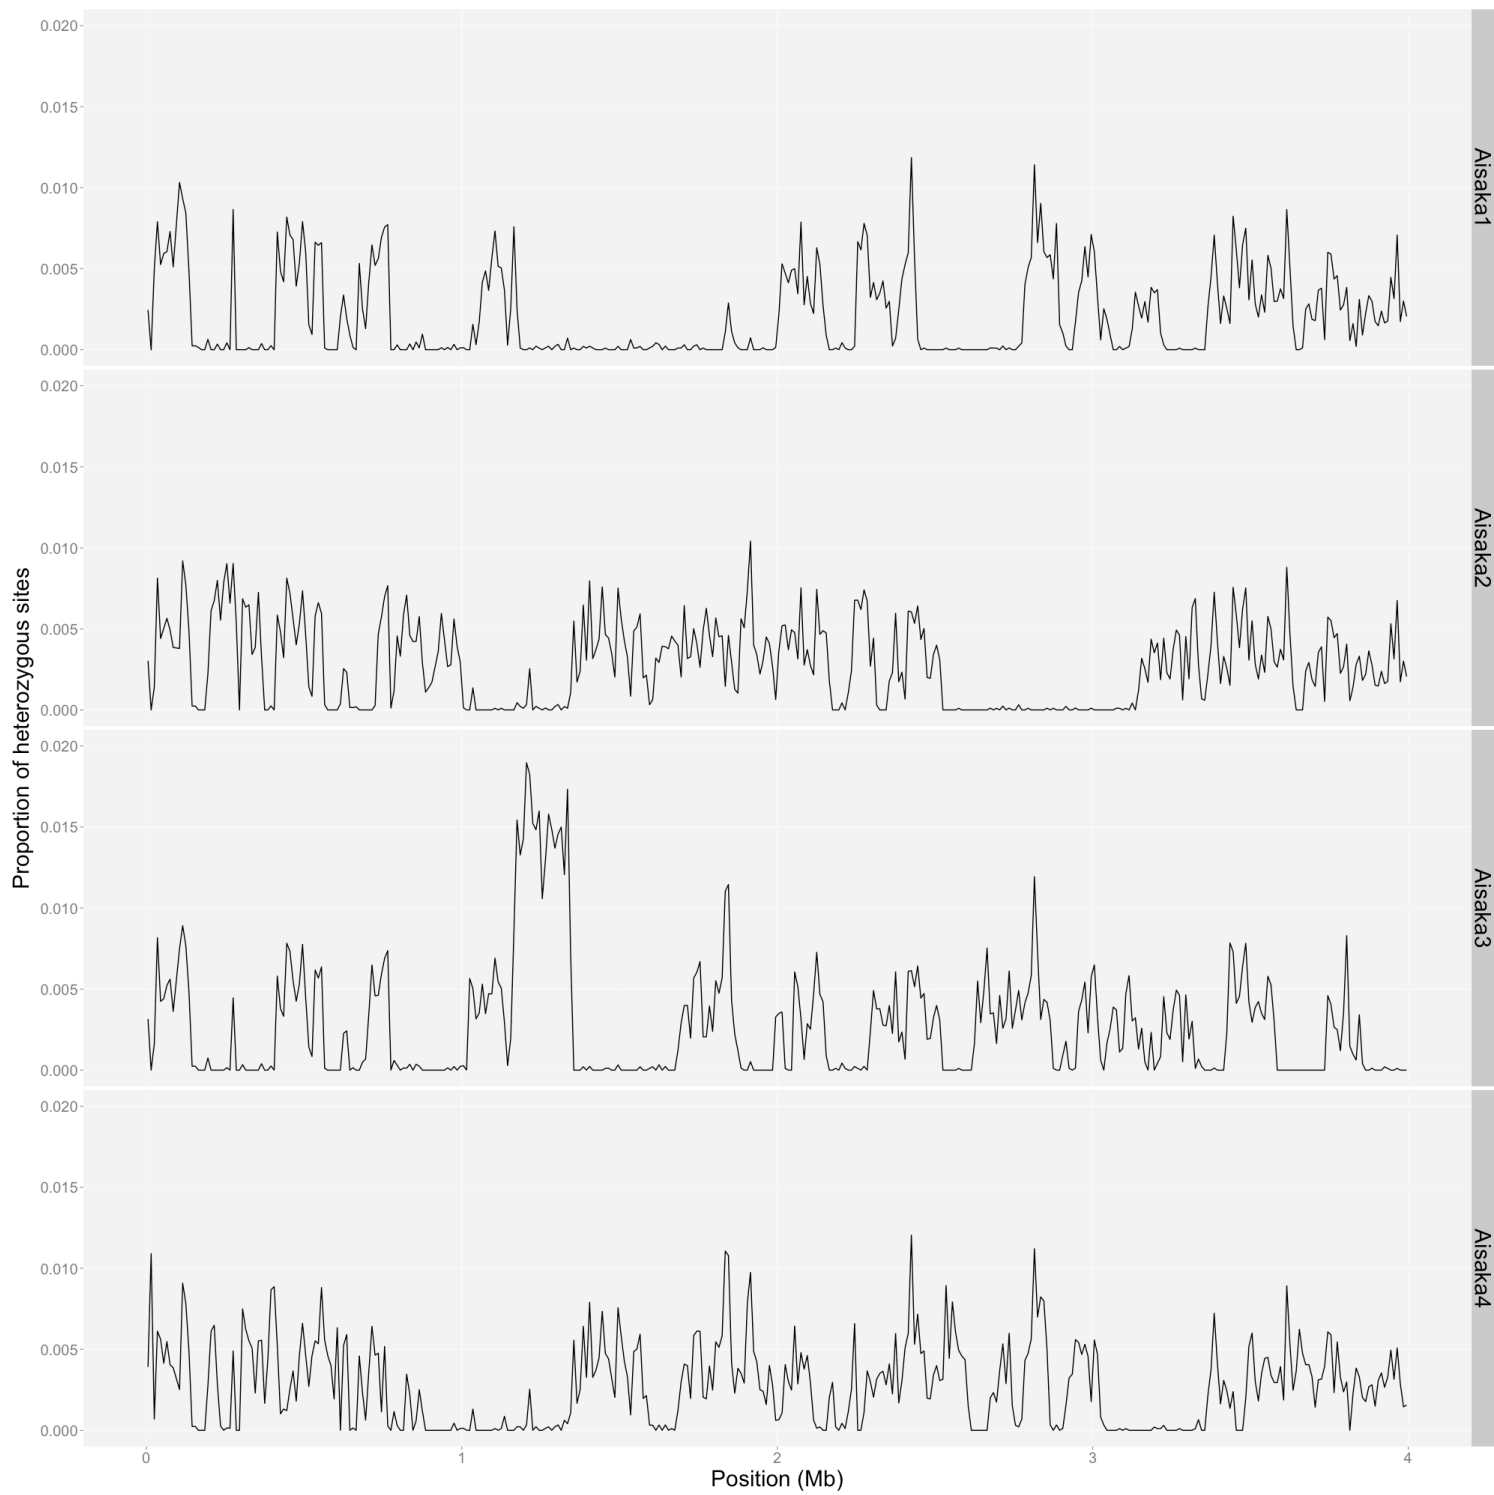

Supplement: ECE3-6-2190-s004.pdf [file ECE3-6-2190-s004.pdf]
